# Supplementary material for: A Simple Microextraction Method for Toxic Industrial Dyes Using a Fatty-Acid Solvent Mixture
Source: MDPI journal article supplement (doi:10.3390/separations8090135), 2021-08-26
Supplement: s1 [file s1]

Archive with 1 entries (1 files):
- separations-1346563-supplementary.pdf
