# Supplementary material for: A Simple Microextraction Method for Toxic Industrial Dyes Using a Fatty-Acid Solvent Mixture
Source: MDPI journal article supplement (doi:10.3390/separations8090135), 2021-08-26
Supplement: s1 [file s1 › separations-1346563-supplementary.pdf]

## Article

# A Simple Microextraction Method for Toxic Industrial Dyes Using a Fatty-Acid Solvent Mixture

Danielle P. Arcon and Francisco C. Franco, Jr. \*

Chemistry Department, De La Salle University, 2401 Taft Avenue, Manila 0922, Philippines; danielle\_arcon@dlsu.edu.ph

\* Correspondence: francisco.franco@dlsu.edu.ph

**Table S1.** Summary of the <sup>1</sup>H NMR chemical shifts.

|                   | $\delta$ (ppm) |                |                |                |                |
|-------------------|----------------|----------------|----------------|----------------|----------------|
|                   | H <sub>E</sub> | H <sub>D</sub> | H <sub>C</sub> | H <sub>B</sub> | H <sub>A</sub> |
| C12               | 11.84          | 2.13           | 1.46           | 1.21           | 0.82           |
| C6                | 1.51           | 2.09           | 1.44           | 1.19           | 0.77           |
| C12:C6            | 11.88          | 2.10           | 1.46           | 1.21           | 0.79           |
| C12:C6 with water | 9.44           | 2.18           | 1.49           | 1.18           | 0.79           |

**Citation:** Arcon, D.; Franco Jr., F. A Simple Microextraction Method for Toxic Industrial Dyes Using a Fatty Acid Solvent Mixture. *Separations* **2021**, *8*, 135. <https://doi.org/10.3390/separations8090135>

Academic Editor: Marcello Locatelli

Received: 2 August 2021

Accepted: 19 August 2021

Published: 26 August 2021

**Publisher's Note:** MDPI stays neutral with regard to jurisdictional claims in published maps and institutional affiliations.

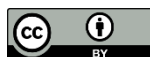

**Copyright:** © 2021 by the authors. Submitted for possible open access publication under the terms and conditions of the Creative Commons Attribution (CC BY) license (<http://creativecommons.org/licenses/by/4.0/>).
